# Supplementary material
Source: Springer Nature journal article supplement (https://www.springermedizin.de/resource/supplementary/12889_2013_6360_MOESM3_ESM.docx/9497720)
Supplement: MOESM3 [file 9497720]

## Table 2. Family planning practice (n=408).

| Variables | n | % |
| --- | --- | --- |
| Planning pregnancy |  |  |
| Yes | 27 | 6.7 |
| No | 374 | 92.3 |
| Unsure | 4 | 1.0 |
| Knowledge of family planning methods (multiple answers) |  |  |
| Any modern method | 398 | 97.8 |
| Any traditional method | 0 | 0.0 |
| None | 9 | 2.2 |
| Sterilization | 185 | 45.5 |
| Pill | 341 | 83.8 |
| Intrauterine device | 249 | 61.2 |
| Injection | 299 | 73.5 |
| Implant | 191 | 46.9 |
| Condom | 363 | 89.2 |
| Source of family planning |  |  |
| Any health facility | 356 | 87.7 |
| Used contraceptive method during sexual intercourse* |  |  |
| Every time | 194 | 68.5 |
| Sometimes/Never | 62 | 29.5 |
| Unsure | 2 | 2.0 |
| Being able to ask partner to use condom* |  |  |
| Always | 170 | 58.6 |
| Sometimes | 85 | 29.3 |
| Never | 35 | 12.1 |
| Being able to refuse sexual intercourse with partner* |  |  |
| Possible | 175 | 68.1 |
| Impossible | 70 | 27.2 |
| Unsure | 12 | 4.7 |
| Variables related to last sexual intercourse |  |  |
| Time |  |  |
| ≤4 weeks | 154 | 37.8 |
| ≤3 months | 37 | 9.1 |
| ≤1 year | 22 | 5.4 |
| >1 year | 113 | 27.8 |
| Never | 2 | 0.5 |
| Unsure | 79 | 19.4 |
| Partner |  |  |
| Husband | 223 | 87.7 |
| Partner living together | 15 | 5.9 |
| Boyfriend | 10 | 3.9 |
| Other | 1 | 0.4 |
| Unsure | 5 | 2.0 |
| Family planning methods (multiple answers) |  |  |
| Any modern method | 228 | 81.4 |
| Any traditional method | 3 | 1.1 |
| Two methods (condom + modern method) | 49 | 17.5 |
| None | 39 | 15.2 |
| Sterilization | 9 | 3.2 |
| Pill | 40 | 14.2 |
| IUD | 17 | 6.0 |
| Injection | 10 | 3.6 |
| Implant | 9 | 3.2 |
| Condom | 193 | 68.7 |

*Total number of women with partners
